# Supplementary material for: Clinical S. aureus Isolates Vary in Their Virulence to Promote Adaptation to the Host
Source: MDPI journal article supplement (doi:10.3390/toxins11030135), 2019-03-01
Supplement: s1 [file s1]

# Supplementary Materials: Clinical *S. aureus* Isolates Vary in Their Virulence to Promote Adaptation to the Host

Lorena Tuchscher, Christine Pöllath, Anke Siegmund, Stefanie Deinhardt-Emmer, Verena Hoerr, Carl-Magnus Svensson, Marc Thilo Figge, Stefan Monecke and Bettina Löffler

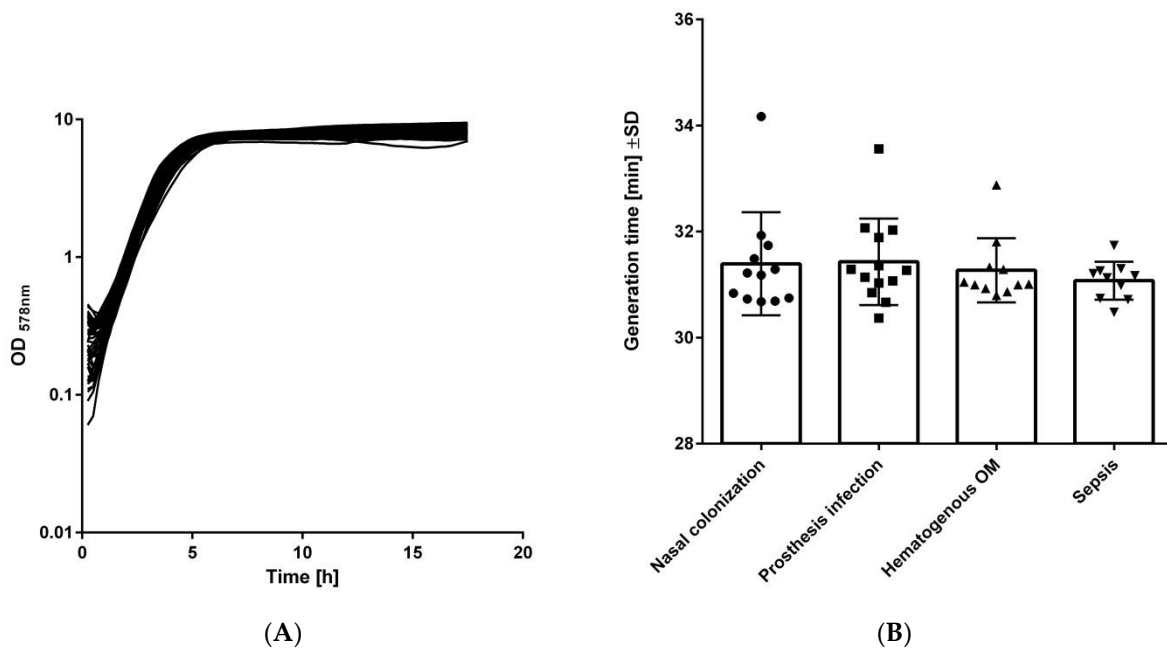

Figure S1. Growth dynamics of *S. aureus* isolates.

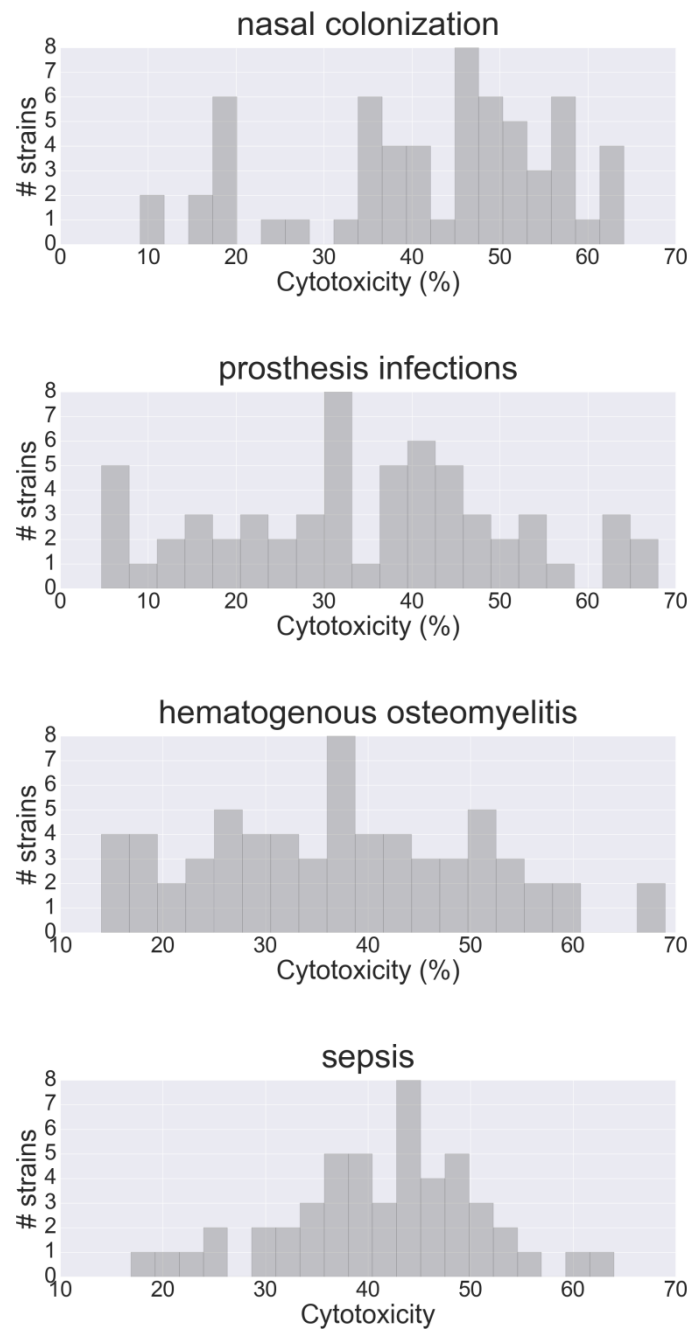

**Figure S2.** Cytotoxicity of *S. aureus* isolates.

**Table S1.** Clinical characteristics of all patients.

| Characteristics                                                      | Nasal Colonization     | Prosthesis Infection            | Hematogenous Osteomyelitis | Sepsis             |
|----------------------------------------------------------------------|------------------------|---------------------------------|----------------------------|--------------------|
| <b>Total Number</b>                                                  | 12                     | 12                              | 13                         | 10                 |
| <b>Median Age [years]</b>                                            | 49.08 (range 40–64)    | 66 (range 33–85)                | 75.23 (range 47–96)        | 62.7 (range 53–78) |
| <b>Male</b>                                                          | 6 (50,0%) <sup>a</sup> | 9 (75.0%)                       | 8 (61.5%)                  | 5 (50,0%)          |
| <b>Case Fatality</b>                                                 | -                      | 0                               | 5 (38.5%)                  | 2 (20.0%)          |
| <b>Underlying Condition</b>                                          |                        |                                 |                            |                    |
| <b>Immunosuppression</b>                                             | -                      | 2 (16.7%)                       | 3 (23.1%)                  | 3 (30.0%)          |
| <b>Diabetes Mellitus</b>                                             | -                      | 2 (16.7%)                       | 5 (38.5%)                  | 7 (70.0%)          |
| <b>Malignant Disease</b>                                             | -                      | 0                               | 2 (15.4%)                  | 2 (20.0%)          |
| <b>Indwelling Devices</b>                                            | -                      | 7 (58.3%)                       | 2 (15.4%)                  | 1 (10.0%)          |
| <b>Renal Disease</b>                                                 | -                      | 5 (41.7%)                       | 12 (92.3%)                 | 7 (70.0%)          |
| <b>Cardiovascular Disease</b>                                        | -                      | 9 (75.0%)                       | 8 (61.5%)                  | 9 (90.0%)          |
| <b>Liver Disease</b>                                                 | -                      | 3 (25.0%)                       | 1 (7.7%)                   | 4 (40.0%)          |
| <b>Origin of Infection/Primary Focus</b>                             |                        |                                 |                            |                    |
| <b>Unknown</b>                                                       | -                      | 0                               | 3 (23.0%)                  | 0                  |
| <b>Bone</b>                                                          | -                      | 12 (100%)                       | 7 (53.8%)                  | 0                  |
| <b>Wound/Skin</b>                                                    | -                      | 0                               | 1 (7.7%)                   | 2 (20.0%)          |
| <b>Intravenous Catheter</b>                                          | -                      | 0                               | 2 (15.4%)                  | 0                  |
| <b>Lung</b>                                                          | -                      | 0                               | 0                          | 6 (60.0%)          |
| <b>Gastrointestinal Tract</b>                                        | -                      | 0                               | 0                          | 2 (20.0%)          |
| <b>Hospital Stays During Last 3 years (in Relation to Infection)</b> |                        |                                 |                            |                    |
| <b>None</b>                                                          | -                      | 3 (25%)                         | 10 (76.9%)                 | 9 (90.0%)          |
| <b>1</b>                                                             | -                      | 0                               | 2 (15.4%)                  | 0                  |
| <b>≥ 2</b>                                                           | -                      | 9 (75%)                         | 1 (7.7%)                   | 1 (10.0%)          |
| <b>Median Length of Hospital Stay [days]</b>                         | -                      | 60 (range 14–1080) <sup>b</sup> | 30 (range 9–180)           | 17,5 (range 2–360) |

a: one sample couldn't be assigned to sex; b: no data available for one isolate from the group of prosthesis infection.

**Table S2.** Distribution of clonal complexes amongst staphylococcal isolates from nasal colonization, prosthesis infection, hematogenous osteomyelitis and sepsis. The number of isolates are indicated between parentheses.

| Clonal Complex<br>(CC) | Nasal<br>Colonization | Prosthesis<br>Infection | Hematogenous<br>Osteomyelitis | Sepsis   | <i>p</i><br>(Fisher exact test) |
|------------------------|-----------------------|-------------------------|-------------------------------|----------|---------------------------------|
|                        | (n = 12)              | (n = 12)                | (n = 13)                      | (n = 10) |                                 |
| CC1                    | 0                     | 0                       | 7.7% (1)                      | 10% (1)  | 0.58                            |
| CC5                    | 16.6% (2)             | 25% (3)                 | 0                             | 10% (1)  | 0.27                            |
| CC6                    | 8.3% (1)              | 8.3% (1)                | 7.7% (1)                      | 0        | 1                               |
| CC7                    | 0                     | 33.3% (4)               | 0                             | 0        | 0.007                           |
| CC8                    | 0                     | 16.6% (2)               | 15.4% (2)                     | 10% (1)  | 0.62                            |
| CC15                   | 8.3% (1)              | 0                       | 15.4% (2)                     | 10% (1)  | 0.72                            |
| CC22                   | 0                     | 0                       | 30.8% (4)                     | 30% (3)  | 0.02                            |
| CC25                   | 8.3% (1)              | 0                       | 7.7% (1)                      | 0        | 1                               |
| CC30                   | 16.6% (2)             | 8.3% (1)                | 0                             | 0        | 0.38                            |
| CC45                   | 25% (3)               | 0                       | 7.7% (1)                      | 30% (3)  | 0.12                            |
| CC101                  | 0                     | 0                       | 7.7% (1)                      | 0        | 1                               |
| CC121                  | 0                     | 8.3% (1)                | 0                             | 0        | 0.72                            |
| CC398                  | 16.6% (2)             | 0                       | 0                             | 0        | 0.16                            |

**Table S3.** Frequencies of selected genes in the defined isolate groups.

| Gene                      | Product                                               | Nasal colonization     | Prosthesis infection    | Hematogenous osteomyelitis | Sepsis                 | <i>P</i> (Fisher test) |
|---------------------------|-------------------------------------------------------|------------------------|-------------------------|----------------------------|------------------------|------------------------|
| <b>Regulation</b>         |                                                       |                        |                         |                            |                        |                        |
| <i>agrI</i>               | Accessory gene regulator allele I                     | 58.3% (7)              | 66.7% (8)               | 69.2% (9)                  | 70.0% (7)              | 0.95                   |
| <i>agrII</i>              | Accessory gene regulator allele II                    | 25.0% (3)              | 25.0% (3)               | 15.4% (2)                  | 20.0% (2)              | 0.93                   |
| <i>agrIII</i>             | Accessory gene regulator allele III                   | 16.7% (2)              | 8.3% (1)                | 7.7% (1)                   | 10.0% (1)              | 0.93                   |
| <i>agrIV</i>              | Accessory gene regulator allele IV                    | 0                      | 0                       | 7.7% (1)                   | 0                      | 1                      |
| <b>Resistance</b>         |                                                       |                        |                         |                            |                        |                        |
| <i>bla</i>                | $\beta$ -lactamase                                    | 58.3% (7)              | 58.3% (7)               | 46.2% (6)                  | 90.0% (9)              | 0.18                   |
| <i>ermA</i>               | Erythromycin / clindamycin resistance gene A          | 0                      | 16.7% (2)               | 0                          | 20.0% (2)              | 0.17                   |
| <i>ermB</i>               | Erythromycin / clindamycin resistance gene B          | 0                      | 0                       | 0                          | 0                      | -                      |
| <i>ermC</i>               | Erythromycin / clindamycin resistance gene C          | 0                      | 8.3% (1)                | 0                          | 0                      | 0.72                   |
| <i>fosB</i>               | Metallothiol transferase                              | 58.3% (7)              | 66.7% (8)               | 53.8% (7)                  | 30.0% (3)              | 0.42                   |
| <i>mecA</i>               | Alternate penicillin binding protein 2, defining MRSA | 0                      | 16.7% (2)               | 7.7% (1)                   | 10.0% (1)              | 0.61                   |
| <i>tetEfflux</i>          | Transport-/ efflux protein                            | 100% (12)              | 100% (12)               | 69.2% (9)                  | 70.0% (7)              | <b>0.03</b>            |
| <i>tetK</i>               | Tetracycline resistance gene K                        | 0                      | 0                       | 7.7% (1)                   | 10.0% (1)              | 0.58                   |
| <i>tetM</i>               | Tetracycline resistance gene M                        | 0                      | 8.3% (1)                | 0                          | 0                      | 0.73                   |
| <i>vanA</i>               | Vancomycin resistance gene                            | 0                      | 0                       | 0                          | 0                      | -                      |
| <b>Enterotoxins</b>       |                                                       |                        |                         |                            |                        |                        |
| <i>sea</i>                | Staphylococcal enterotoxin A                          | 16.7% (2)              | 16.7% (2)               | 15.4% (2)                  | 0                      | 0.6                    |
| <i>seb</i>                | Staphylococcal enterotoxin B                          | 8.3% (1)               | 0                       | 15.4% (2)                  | 0                      | 0.6                    |
| <i>sec, sel</i>           | Staphylococcal enterotoxin C+L                        | 25.0% (3)              | 0                       | 15.4% (2)                  | 10.0% (1)              | 0.33                   |
| <i>sed, sej, ser</i>      | Staphylococcal enterotoxin D+J+R                      | 0                      | 25.0% (3)               | 7.7% (1)                   | 20.0% (2)              | 0.24                   |
| <i>see</i>                | Staphylococcal enterotoxin E                          | 0                      | 0                       | 0                          | 0                      | -                      |
| <i>egc-cluster</i>        | Staphylococcal enterotoxin G+I+M+N+O+U                | 66.7% (8)              | 33.3% (4)               | 53.8% (7)                  | 70.0% (7)              | 0.29                   |
| <i>seh</i>                | Staphylococcal enterotoxin H                          | 8.3% (1)               | 0                       | 7.7% (1)                   | 10.0% (1)              | 0.89                   |
| <i>sek, seq</i>           | Staphylococcal enterotoxin K+Q                        | 0                      | 8.3% (1)                | 7.7% (1)                   | 0                      | 1                      |
| <i>tst1</i>               | Toxic shock syndrome toxin (TSST)-1                   | 16.7% (2)              | 0                       | 0                          | 0                      | 0.16                   |
| <i>entP</i>               | Enterotoxin P                                         | 0 <sup>b</sup>         | 41.7% (5) <sup>b</sup>  | 0                          | 10.0% (1)              | <b>0.003</b>           |
| <b>Hemolysins</b>         |                                                       |                        |                         |                            |                        |                        |
| <i>hla</i>                | $\alpha$ -toxin                                       | 100% (12)              | 100% (12)               | 100% (13)                  | 100% (10)              | -                      |
| <i>hlb</i>                | $\beta$ -toxin                                        | 75.0% (9)              | 100% (12)               | 11                         | 80.0% (8)              | 0.38                   |
| <i>hld</i>                | $\delta$ -toxin                                       | 100% (12)              | 100% (12)               | 100% (13)                  | 100% (10)              | -                      |
| <b>Leukocidins</b>        |                                                       |                        |                         |                            |                        |                        |
| <i>lukF, hlgA</i>         | $\gamma$ -toxin                                       | 100% (12)              | 100% (12)               | 100% (13)                  | 100% (10)              | -                      |
| <i>lukF-PV</i>            | Panton-Valentin-leukotoxin                            | 8.3% (1)               | 0                       | 0                          | 0                      | 0.72                   |
| <i>lukD, lukE</i>         | Leukocidin D, E component                             | 41.7% (5) <sup>c</sup> | 91.7% (11) <sup>c</sup> | 61.5% (8)                  | 40.0% (4)              | <b>0.034</b>           |
| <b>Exfoliative toxins</b> |                                                       |                        |                         |                            |                        |                        |
| <i>etA</i>                | Exfoliative toxin A                                   | 8.3% (1)               | 0                       | 0                          | 0                      | 0.72                   |
| <i>etB</i>                | Exfoliative toxin B                                   | 0                      | 0                       | 0                          | 0                      | -                      |
| <i>etD</i>                | Exfoliative toxin D                                   | 8.3% (1)               | 0                       | 7.7% (1)                   | 0                      | 1                      |
| <b>Enzymes</b>            |                                                       |                        |                         |                            |                        |                        |
| <i>aur</i>                | Aureolysin                                            | 100% (12)              | 100% (12)               | 100% (13)                  | 100% (10)              | -                      |
| <i>chp</i>                | Chemotaxis inhibitory protein (CHIP)                  | 66.7% (8)              | 25.0% (3)               | 61.5% (8)                  | 80.0% (8)              | 0.06                   |
| <i>splA, splB</i>         | Serine protease A, B                                  | 41.7% (5) <sup>d</sup> | 91.7% (11) <sup>d</sup> | 61.5% (8)                  | 40.0% (4) <sup>d</sup> | <b>0.034</b>           |
| <i>splE</i>               | Serine protease E                                     | 41.7% (5)              | 66.7% (8) <sup>e</sup>  | 46.2% (6)                  | 10% (1) <sup>e</sup>   | 0.07                   |
| <i>sspA, sspB</i>         | Glutamyl endopeptidase                                | 100% (12)              | 100% (12)               | 100% (13)                  | 100% (10)              | -                      |
| <i>sak</i>                | Staphylokinase                                        | 66.7% (8) <sup>f</sup> | 100% (12) <sup>f</sup>  | 84.6% (11)                 | 80.0% (8)              | 0.17                   |
| <i>scn</i>                | Staphylococcal complement inhibitor                   | 91.7% (11)             | 100% (12)               | 100% (13)                  | 100% (10)              | 0.72                   |

| Exopolysaccharides  |                                                          |                        |                         |                        |                        |       |
|---------------------|----------------------------------------------------------|------------------------|-------------------------|------------------------|------------------------|-------|
| <i>cap5</i>         | Capsular polysaccharide 5                                | 41.7% (5)              | 41.7% (5)               | 46.2% (6)              | 50.0% (5)              | 1     |
| <i>cap8</i>         | Capsular polysaccharide 8                                | 58.3% (7)              | 58.3% (7)               | 53.8% (7)              | 50.0% (5)              | 1     |
| <i>icaA, D, C</i>   | Polysaccharide intracellular adhesin                     | 100% (12)              | 100% (12)               | 100% (13)              | 100% (10)              | -     |
| Adhesins            |                                                          |                        |                         |                        |                        |       |
| <i>bbp</i>          | Bone sialoprotein-binding protein                        | 91.7% (11)             | 91.7% (11)              | 100% (13)              | 100% (10)              | 0.71  |
| <i>clfA, clfB</i>   | Clumping factors A and B                                 | 100% (12)              | 100% (12)               | 100% (13)              | 100% (10)              | -     |
| <i>cna</i>          | Collagen binding adhesin                                 | 58.3% (7)              | 25.0% (3)               | 61.5% (8)              | 70.0% (7)              | 0.15  |
| <i>ebh</i>          | Cell wall associated fibronectin-binding protein         | 100% (12)              | 100% (12)               | 69.2% (9)              | 70.0% (7)              | 0.02  |
| <i>ebps</i>         | Cell surface elastin-binding protein                     | 100% (12)              | 100% (12)               | 100% (13)              | 100% (10)              | -     |
| <i>eno</i>          | Enolase                                                  | 100% (12)              | 100% (12)               | 100% (13)              | 100% (10)              | -     |
| <i>fib</i>          | Fibrinogen-binding protein                               | 100% (12)              | 100% (12)               | 100% (13)              | 100% (10)              | -     |
| <i>fnbA</i>         | Fibronectin-binding protein A                            | 100% (12)              | 100% (12)               | 100% (13)              | 100% (10)              | -     |
| <i>fnbB</i>         | Fibronectin-binding protein B                            | 83.3% (10)             | 83.3% (10)              | 69.2% (9)              | 100% (10)              | 0.32  |
| <i>map</i>          | Major histocompatibility complex class II analog protein | 100% (12)              | 91.7% (11)              | 100% (13)              | 100% (10)              | 0.72  |
| <i>sasG</i>         | <i>S. aureus</i> surface protein G                       | 33.3% (4)              | 58.3% (7)               | 69.2% (9)              | 70.0% (7)              | 0.26  |
| <i>sdrC</i>         | Serine-aspartate repeat protein C                        | 100% (12)              | 100% (12)               | 100% (13)              | 100% (10)              | -     |
| <i>sdrD</i>         | Serine-aspartate repeat protein D                        | 91.7% (11)             | 91.7% (11)              | 92.3% (12)             | 100% (10)              | 1     |
| <i>vwb</i>          | Van Willebrand factor binding protein                    | 100% (12)              | 100% (12)               | 100% (13)              | 100% (10)              | -     |
| Miscellaneous       |                                                          |                        |                         |                        |                        |       |
| <i>edinA, edinC</i> | Epidermal cell differentiation inhibitor A+C             | 0                      | 0                       | 0                      | 0                      | -     |
| <i>edinB</i>        | Epidermal cell differentiation inhibitor B               | 8.3% (1)               | 0                       | 7.7% (1)               | 0                      | 1     |
| <i>setC*</i>        | Staphylococcal exotoxin-like protein                     | 66.7% (8) <sup>g</sup> | 91.7% (11)              | 100% (13) <sup>g</sup> | 100% (10)              | 0.08  |
| <i>ssl6</i>         | Staphylococcal superantigen-like protein 6               | 8.3% (1) <sup>h</sup>  | 58.3% (7) <sup>h</sup>  | 38.5% (5)              | 30.0% (3)              | 0.08  |
| <i>ssl8</i>         | Staphylococcal superantigen-like protein 8               | 41.7% (5) <sup>i</sup> | 91.7% (11) <sup>i</sup> | 61.5% (8)              | 40.0% (4) <sup>i</sup> | 0.034 |
| <i>ssl11</i>        | Staphylococcal superantigen-like protein 11              | 75.0% (9)              | 100% (12) <sup>j</sup>  | 53.8% (7) <sup>j</sup> | 40.0% (4) <sup>j</sup> | 0.007 |

a: *p* values were calculated with fishers exact test; b: significant difference between nasal colonization and prosthesis infection ( $p = 0.037$ ), and between prosthesis infection and hematogenous OM ( $p = 0.015$ ); c: significant difference between nasal colonization and prosthesis infection ( $p = 0.027$ ) and prosthesis infection and sepsis ( $p = 0.02$ ); d: significant difference between nasal colonization and prosthesis infection ( $p = 0.027$ ) and prosthesis infection and sepsis ( $p = 0.02$ ); e: significant difference between prosthesis infection and sepsis ( $p = 0.011$ ); f: significant difference between nasal colonization and prosthesis infection ( $p = 0.047$ ); g: significant difference between prosthesis infection and hematogenous OM ( $p = 0.039$ ); h: significant difference between nasal colonization and prosthesis infection ( $p = 0.027$ ); i: significant difference between nasal colonization and prosthesis infection ( $p = 0.027$ ) and prosthesis infection and sepsis ( $p = 0.02$ ); j: significant difference between prosthesis infection and hematogenous OM ( $p = 0.015$ ) and prosthesis infection and sepsis ( $p = 0.03$ )

**Table S5.** Main characteristics of selected strains for long-term cell culture and the mouse sepsis model.

|                                  | N15                | Chwa42                     | Edbr39                     | N9                            | M1                             | Udmi62                         | D2                               |
|----------------------------------|--------------------|----------------------------|----------------------------|-------------------------------|--------------------------------|--------------------------------|----------------------------------|
| Group                            | Nasal colonization | Hematogenous osteomyelitis | Hematogenous osteomyelitis | Nasal colonization            | Prosthesis infection           | Sepsis                         | Hematogenous osteomyelitis       |
| Hemolysis [OD 570nm]             | low                | low                        | low                        | high                          | high                           | high                           | high                             |
| Invasion [%]                     | high               | high                       | high                       | low                           | low                            | low                            | low                              |
| Cytotoxicity [%]                 | low                | low                        | low                        | high                          | high                           | high                           | high                             |
| cp <i>hla</i> /cp <i>gyrB</i>    | low                | low                        | low                        | high                          | high                           | high                           | high                             |
| cp <i>psma</i> /cp <i>gyrB</i>   | low                | low                        | low                        | high                          | high                           | high                           | high                             |
| cp <i>agrA</i> /cp <i>gyrB</i>   | low                | low                        | low                        | high                          | high                           | high                           | high                             |
| cp <i>rnaIII</i> /cp <i>gyrB</i> | low                | low                        | low                        | high                          | high                           | high                           | high                             |
| Range                            | Hemolysis          | Invasion [%]               | Cytotoxicity [%]           | cp <i>hla</i> /cp <i>gyrB</i> | cp <i>psma</i> /cp <i>gyrB</i> | cp <i>agrA</i> /cp <i>gyrB</i> | cp <i>rnaIII</i> /cp <i>gyrB</i> |
| low                              | 0–0.13             | 2.4–40                     | 7.1–40                     | 0–7                           | 0–250                          | 0.01–2.3                       | 0.1–8                            |
| high                             | > 0.13             | > 40                       | > 40                       | > 7                           | > 250                          | > 2.3                          | > 8                              |

**Table S6.** Primers used in this study.

| Gene Name       | Primer Description | Primer Sequence                       | Product Length |
|-----------------|--------------------|---------------------------------------|----------------|
| <i>agrA</i>     | Forward            | 5'-AACTGCACATACACGCTTACA-3'           | 145 nt         |
|                 | Reverse            | 5'-GGCAATGAGTCTGTGAGATTT-3'           |                |
| <i>hla</i>      | Forward            | 5'-CAACTGATAAAAAAGTAGGCTGGAAAGTGAT-3' | 201 nt         |
|                 | Reverse            | 5'-CTGGTGAAAACCCTGAAGATAATAGAG-3'     |                |
| <i>psma</i>     | Forward            | 5'-GCCATTACATGGAATTCGT-3'             | 151 nt         |
|                 | Reverse            | 5'-CAATAGCCATCGTTTTGTCCT-3'           |                |
| <i>rnaIII</i>   | Forward            | 5'-TTCAGTGTGTCGATAATCCA-3'            | 70 nt          |
|                 | Reverse            | 5'-TGATTTCAATGGCACAAGAT-3'            |                |
| <i>gyrB</i> (*) | Forward            | 5'-AATTGAAGCAGGCTATGTGT-3'            | 138 nt         |
|                 | Reverse            | 5'-ATAGACCATTTTGGTGTGG-3'             |                |

\* Housekeeping gene
